# Supplementary material for: Siple Dome shallow ice cores: a study in coastal dome microclimatology
Source: Copernicus journal article supplement (doi:10.5194/cp-10-1253-2014), 2014-06-26
Supplement: Supplementary file 1 [file cp-10-1253-2014-supplement.zip]

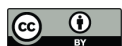

## *Supplement of*

## **Siple Dome shallow ice cores: a study in coastal dome microclimatology**

**T. R. Jones et al.**

*Correspondence to:* T. R. Jones ([tyler.jones@colorado.edu](mailto:tyler.jones@colorado.edu))

- Supplement-Cover-Letter.pdf
- SipleDome\_ShallowCore\_AnnualLayers.txt
- SipleDome\_ShallowCore\_Density.txt
- SipleDome\_ShallowCore\_WaterIsotopes.txt
- \_\_MACOSX
  - .\_SipleDome\_ShallowCore\_AnnualLayers.txt
  - .\_SipleDome\_ShallowCore\_Density.txt
  - .\_SipleDome\_ShallowCore\_WaterIsotopes.txt
